# Supplementary material
Source: MDPI journal article supplement (https://www.mdpi.com/2227-9717/9/1/163)
Supplement: s1 [file s1]

## Supplementary Material

Article

# Oxygen Blown Gasification of Pulp Mill Bark Residues for Synthetic Fuel Production

Fredrik Weiland<sup>1\*</sup>, Sandra Lundström<sup>1</sup>, Yngve Ögren<sup>1</sup>

<sup>1</sup> RISE Energy Technology Center AB, Box 726, S-941 28 Piteå, Sweden; infoetc@ri.se

\* Correspondence: fredrik.weiland@ri.se; Tel.: +46 10 516 61 83

Table S1. Elemental composition [mol-%] of bottom ash from softwood and hardwood bark measured using SEM-EDS. The average and standard deviations were calculated based on measurements of three different spots per sample.

| Element        | Softwood bark   |         | Hardwood bark   |         |
|----------------|-----------------|---------|-----------------|---------|
|                | Average [mol-%] | St.dev. | Average [mol-%] | St.dev. |
| Oxygen (O)     | 50.7            | 12.3    | 48.9            | 9.7     |
| Carbon (C)     | 20.9            | 16.1    | 26.2            | 16.5    |
| Silicon (Si)   | 14.0            | 5.5     | 8.9             | 3.3     |
| Calcium (Ca)   | 5.1             | 4.4     | 8.6             | 3.0     |
| Iron (Fe)      | 2.1             | 2.5     | 1.1             | 1.4     |
| Potassium (K)  | 1.5             | 1.1     | 1.1             | 0.4     |
| Aluminum (Al)  | 2.8             | 1.4     | 2.3             | 0.9     |
| Magnesium (Mg) | 1.1             | 0.5     | 1.2             | 0.4     |
| Phosphorus (P) | 0.4             | 0.5     | 0.6             | 1.2     |
| Sodium (Na)    | 0.8             | 0.6     | 0.7             | 0.2     |
| Manganese (Mn) | 0.2             | 0.6     | 0.1             | <0.1    |
| Titanium (Ti)  | 0.3             | 0.5     | 0.1             | 0.1     |
| Sulfur (S)     | <0.1            | <0.1    | 0.1             | 0.1     |
| Chlorine (Cl)  | <0.1            | <0.1    | <0.1            | <0.1    |

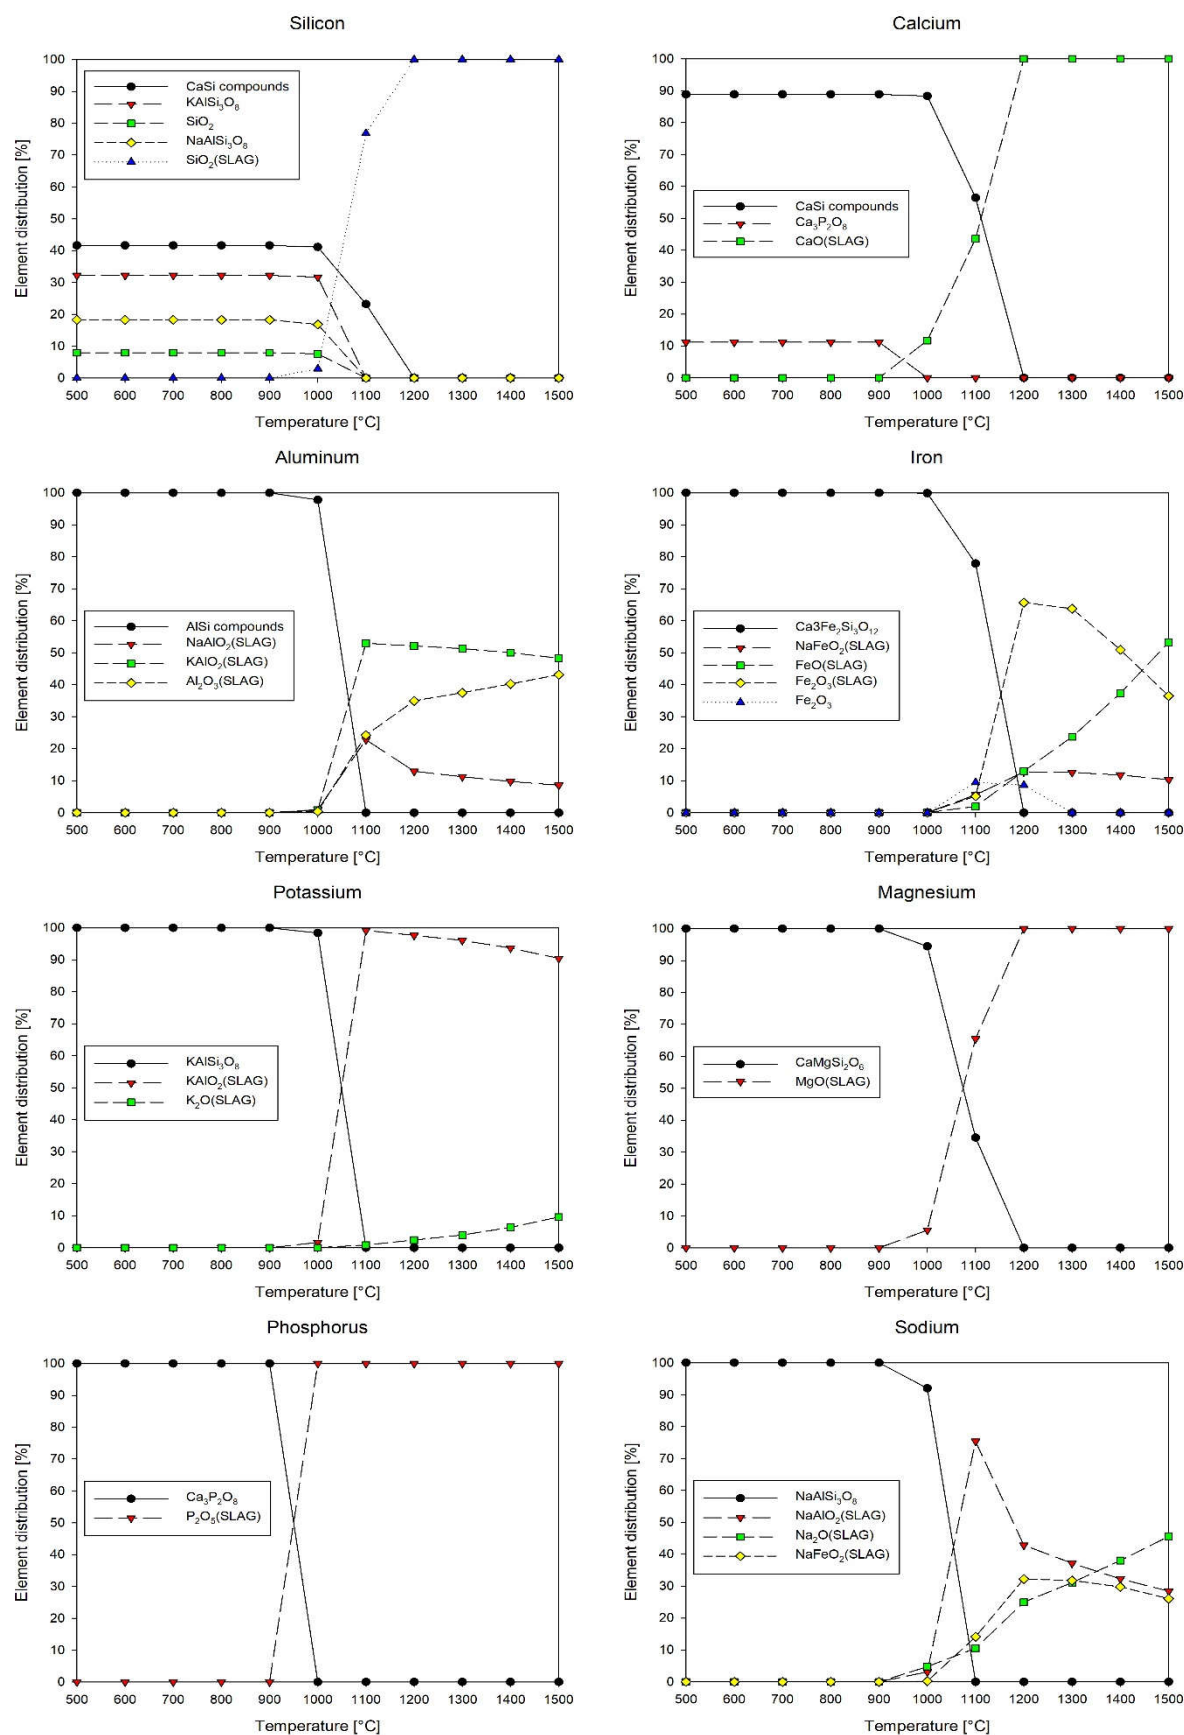

Figure S1. Predicted distribution of major inorganic elements from softwood bark as a function of process temperature [°C].

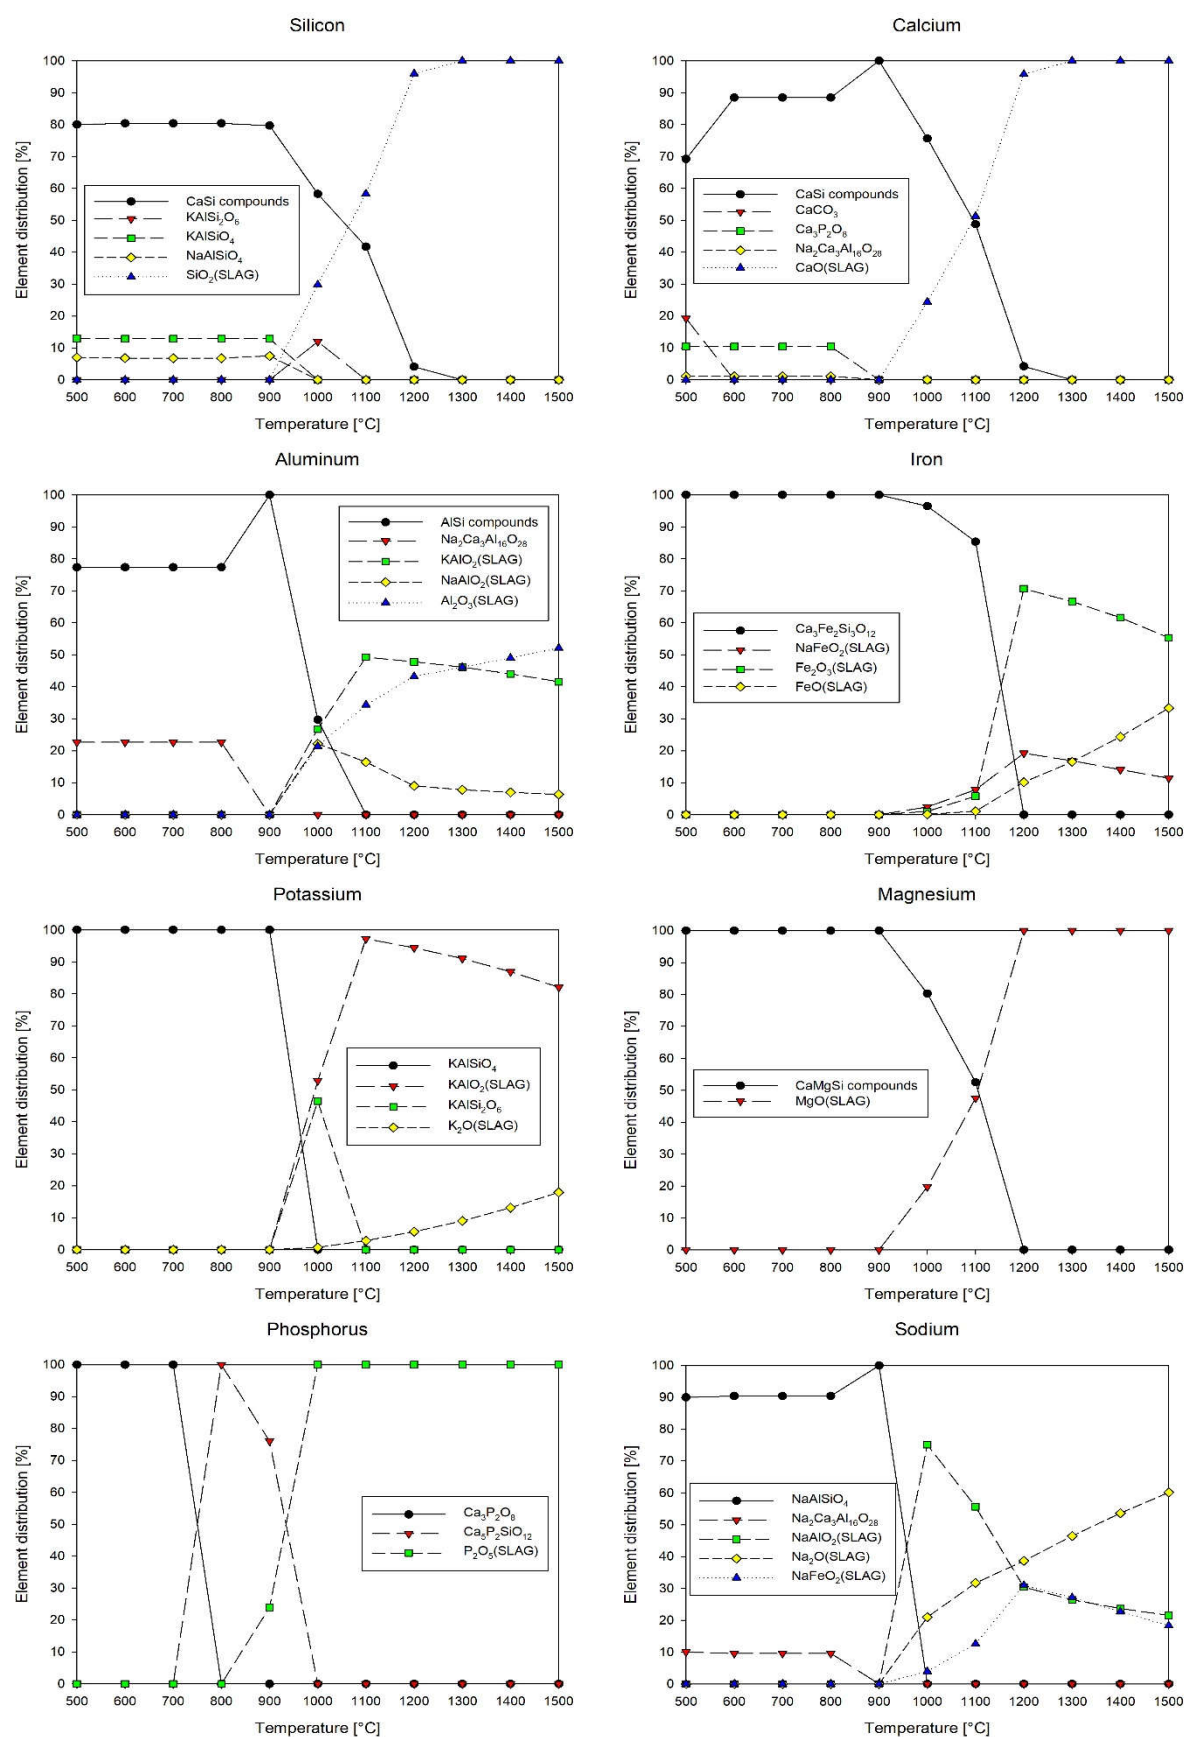

Figure S2. Predicted distribution of major inorganic elements from hardwood bark as a function of process temperature [°C].
